# Supplementary material
Source: PubMed Central journal article supplement (PMC9059608)
Supplement: jcsm.9862.sm001.pdf [file jcsm.9862.sm001.pdf]

**Table S1.** Demographic and clinical characteristics and treatment in patients with narcolepsy type 1 (NT1) and narcolepsy type 2 (NT2) with vs. without clinical REM sleep behavior disorder (RBD).

|                                       | NT1               |                      |         | NT2               |                      |       |
|---------------------------------------|-------------------|----------------------|---------|-------------------|----------------------|-------|
|                                       | With clinical RBD | Without clinical RBD | P       | With clinical RBD | Without clinical RBD | P     |
| Number of patients                    | 115               | 163                  |         | 25                | 165                  |       |
| Men, %                                | 61.8              | 39.9                 | 0.0003* | 48                | 48.5                 | 0.96  |
| Age, y                                | 43.8 ± 18.2       | 39.5 ± 17.8          | 0.052   | 41 ± 13.5         | 34.6 ± 13.2          | 0.02* |
| Disease course, y                     | 18.2 ± 16.8       | 18.3 ± 16.3          | 0.96    | 15.8 ± 9.7        | 11.2 ± 10.6          | 0.01* |
| Epworth sleepiness scale score, 0-24  |                   |                      |         |                   |                      |       |
| - at diagnosis                        | 18.2 ± 4          | 17.9 ± 3.6           | 0.71    | 18.1 ± 4.2        | 16.5 ± 3.6           | 0.02* |
| - at time of the study                | 17.3 ± 4.1        | 16.1 ± 4.4           | 0.03*   | 16 ± 5.1          | 14.8 ± 4.5           | 0.22  |
| Restless legs syndrome, %             | 22.1              | 13.7                 | 0.07    | 8                 | 9.7                  | 0.79  |
| Disrupted nighttime sleep, %          | 68.8              | 49.6                 | 0.006*  | 50                | 46.8                 | 0.96  |
| Psychological symptoms                |                   |                      |         |                   |                      |       |
| BDI-II, 0-63                          | 14.7 ± 9.9        | 11.7 ± 9.6           | 0.02*   | 13.5 ± 11.7       | 13.5 ± 9.6           | 0.75  |
| STAI-Y, A and B score (total), 40-160 | 86.1 ± 23.7       | 78.7 ± 20.24         | 0.02*   | 82.2 ± 29.6       | 85.8 ± 23            | 0.35  |
| STAI-Y, A, 20-80                      | 40.4 ± 12.8       | 36.8 ± 10.5          | 0.02*   | 39.2 ± 15.9       | 40.2 ± 13            | 0.56  |
| STAI-Y, B, 20-80                      | 45.9 ± 12.4       | 42.2 ± 11.6          | 0.03*   | 43 ± 14.7         | 45.6 ± 11.5          | 0.31  |
| Antidepressant use, %                 | 52.2              | 38                   | 0.02*   | 24                | 7.3                  | 0.02* |

Data are the mean ± SD and %. BDI-II: Beck Depression Inventory-II; STAI-Y: State (A)-Trait (B) Anxiety Inventory.

**Table S2.** Subjective somnolence in central disorders of hypersomnolence (including all patients with narcolepsy type 1, narcolepsy type 2 and idiopathic hypersomnia).

|                                                                          | With parasomnia | Without parasomnia | P         | P adjusted for diagnosis |
|--------------------------------------------------------------------------|-----------------|--------------------|-----------|--------------------------|
| <b>Epworth sleepiness scale score at the time of the diagnosis, 0-24</b> |                 |                    |           |                          |
| NREM parasomnias                                                         |                 |                    |           |                          |
| Current NREM parasomnia                                                  | 16.9 ± 6.1      | 16.6 ± 3.9         | 0.82      | 0.95                     |
| Sleep-related eating disorder                                            | 15.2 ± 5.9      | 16.9 ± 3.9         | 0.14      | 0.052                    |
| REM parasomnias                                                          |                 |                    |           |                          |
| Frequent nightmares                                                      | 16.9 ± 4.6      | 16.7 ± 3.2         | 0.62      | 0.99                     |
| Sleep-related hallucinations                                             | 17.9 ± 3.9      | 16.4 ± 3.8         | 0.0002*   | 0.03*                    |
| Sleep paralysis                                                          | 17.3 ± 4.1      | 16.7 ± 3.8         | 0.11      | 0.9                      |
| Sleep talking                                                            | 16.7 ± 3.7      | 16.3 ± 4           | 0.32      | 0.88                     |
| Sleep shouting                                                           | 17.3 ± 3.7      | 16.2 ± 3.9         | 0.02*     | 0.09                     |
| <b>Epworth sleepiness scale score at the time of the study, 0-24</b>     |                 |                    |           |                          |
| NREM parasomnias                                                         |                 |                    |           |                          |
| Current NREM parasomnia                                                  | 16.9 ± 4.5      | 15.5 ± 4.5         | 0.2       | 0.24                     |
| Sleep-related eating disorder                                            | 17.3 ± 4.2      | 15.5 ± 34.5        | 0.054     | 0.15                     |
| REM parasomnias                                                          |                 |                    |           |                          |
| Frequent nightmares <sup>1</sup>                                         | 16.4 ± 4.4      | 15.6 ± 4.4         | 0.051     | 0.1                      |
| Sleep-related hallucinations                                             | 16.8 ± 4.1      | 15.1 ± 4.7         | < 0.0001* | 0.0004*                  |
| Sleep paralysis                                                          | 16.2 ± 4.3      | 15.5 ± 4.7         | 0.06      | 0.47                     |
| Sleep talking                                                            | 15.9 ± 4.4      | 15 ± 4.6           | 0.03*     | 0.19                     |
| Sleep shouting                                                           | 16.3 ± 4.3      | 15.1 ± 4.5         | 0.002*    | 0.02*                    |

<sup>1</sup>frequent nightmares: more than 1 episode per week
